# TABLE OF CONTENTS

# ANESTHESIOLOGY

Volume 135  
Issue 5  
November 2021

|                                                  |     |
|--------------------------------------------------|-----|
| ◆ This Month in ANESTHESIOLOGY .....             | A1  |
| Science, Medicine, and the Anesthesiologist..... | A13 |
| Infographics in Anesthesiology .....             | A17 |

## ◆ Editorial

### Phenylephrine or Ephedrine for Intraoperative Hypotension? Consider the Cerebral Microcirculation

P. S. García, C. H. Brown IV.....775

### December Is for Congregation, Celebration, Operation, Recuperation

W. S. Sandberg.....778

## Special Article

### Beyond the Do-not-resuscitate Order: An Expanded Approach to Decision-making Regarding Cardiopulmonary Resuscitation in Older Surgical Patients

M. B. Allen, R. E. Bernacki, B. L. Gewertz, Z. Cooper, J. L. Abrams,  
A. B. Peetz, A. M. Bader, N. Sadovnikoff.....781

In surgical patients without do-not-resuscitate orders, “full code” is the default option irrespective of clinical circumstances and patient preferences. This approach raises ethical concerns and warrants reconsideration to promote patient autonomy and goal-concordant care.

## Perioperative Medicine

### CLINICAL SCIENCE

### ◆◆ Cerebral Macro- and Microcirculation during Ephedrine *versus* Phenylephrine Treatment in Anesthetized Brain Tumor Patients: A Randomized Clinical Trial Using Magnetic Resonance Imaging

K. U. Koch, I. K. Mikkelsen, U. S. Espelund, H. Angleys, A. Tietze,  
G. V. Oettingen, N. Juul, L. Østergaard, M. Rasmussen.....788

At equal mean arterial pressures, the use of ephedrine results in better brain microcirculation and oxygen delivery than with the use of phenylephrine.

### ◆◆ December Is Coming: A Time Trend Analysis of Monthly Variation in Adult Elective Anesthesia Caseload across Florida and Texas

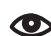

### Locations of a Large Multistate Practice

A. P. Piersa, A. Tung, R. P. Dutton, S. Shahul, D. B. Glick.....804

Administrative data across a large U.S. anesthesia group in 2017 to 2019 demonstrated a 20% increase in average daily elective caseload in December compared with January to November. Exploratory analyses demonstrated that this relationship was observed for colonoscopies (which are likely to be elective) but not for coronary artery bypass grafting (which is unlikely to be elective). The proportion of patients with commercial (rather than government) insurance and aged 18 to 64 yr was also higher in December than in other months of the year. *SUPPLEMENTAL DIGITAL CONTENT IS AVAILABLE IN THE TEXT*

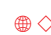

### ◆◆ Neurophysiologic Complexity in Children Increases with Developmental Age and Is Reduced by General Anesthesia

M. P. Puglia II, D. Li, A. M. Leis, E. S. Jewell, C. M. Kaplan, M. Therrian,  
M. Kim, U. Lee, G. A. Mashour, P. E. Vlisides.....813

Using the Lempel–Ziv algorithm, a mathematical method for assessing neural signal complexity, a positive correlation of cortical complexity with age was found in awake, 8- to 16-yr-old children. During anesthetic state transitions in this pediatric population, cortical complexity decreased during the maintenance phase and, upon recovery of consciousness, remained reduced when compared with preanesthesia baseline levels. *SUPPLEMENTAL DIGITAL CONTENT IS AVAILABLE IN THE TEXT*

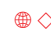

### ◆◆ Persistent Postoperative Opioid Prescription Fulfillment and Peripheral Nerve Blocks for Ambulatory Shoulder Surgery: A Retrospective Cohort Study

G. M. Hamilton, S. Tierney, R. Ramlogan, C. J. L. McCartney,  
L. A. Bromley, D. I. McIsaac.....829

Among 48,523 patients undergoing ambulatory shoulder surgery in Ontario, Canada, between 2012 and 2017, 16% of patients receiving a nerve block and 17% of patients without a nerve block went on to demonstrate

◆ Refers to This Month in ANESTHESIOLOGY

◆ Refers to Editorial

◆ This article has an Audio Podcast

See Supplemental Digital Content

CME Article

This article has a Video Abstract

Readers' Toolbox

This article has a Visual Abstract

OPEN This article is Open Access

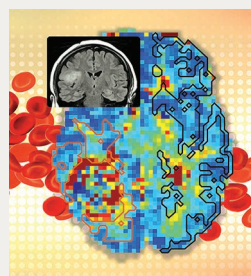

**ON THE COVER:** Phenylephrine, a pure  $\alpha$ -adrenergic agonist, and ephedrine, an indirectly acting  $\alpha$ - and  $\beta$ -adrenergic agonist, are commonly administered during neurosurgical procedures to treat anesthesia-related hypotension and maintain cerebral perfusion pressure. In this issue of ANESTHESIOLOGY, Koch *et al.* compared ephedrine and phenylephrine treatment on cerebral macro- and microcirculation, measured by cerebral blood flow, and capillary transit time heterogeneity, in anesthetized brain tumor patients. In an accompanying editorial, García and Brown discuss the current limitations of intraoperative brain monitoring and the implications of these new findings. Cover Illustration: A. Johnson, Vivo Visuals Studio.

- Koch *et al.*: Cerebral Macro- and Microcirculation during Ephedrine *versus* Phenylephrine Treatment in Anesthetized Brain Tumor Patients: A Randomized Clinical Trial Using Magnetic Resonance Imaging, p. 788
- García and Brown: Phenylephrine or Ephedrine for Intraoperative Hypotension? Consider the Cerebral Microcirculation, p. 775

persistent postoperative opioid prescription fulfillment. This statistically significant difference has questionable clinical significance, and was not reproduced in a variety of sensitivity analyses. There is no consistent association between the receipt of a peripheral nerve block and a lower risk of persistent opioid prescription fulfillment after ambulatory shoulder surgery. *SUPPLEMENTAL DIGITAL CONTENT IS AVAILABLE IN THE TEXT*

-  **Hypoxemia in Young Children Undergoing One-lung Ventilation: A Retrospective Cohort Study**  
T. W. Templeton, S. A. Miller, L. K. Lee, S. Kheterpal, M. R. Mathis, E. J. Goenaga-Díaz, L. B. Templeton, A. K. Saha, for the Multicenter Perioperative Outcomes Group Investigators .....842

In a retrospective multisite cohort study in children aged 2 months to 3 yr having one-lung ventilation for thoracic surgery, hypoxemia was common. Bronchial blocker use as well as left-sided surgeries were associated with a lower risk of hypoxemia during one-lung ventilation. *SUPPLEMENTAL DIGITAL CONTENT IS AVAILABLE IN THE TEXT*

-  **Evaluation of Appropriate Use of Preoperative Echocardiography before Major Abdominal Surgery: A Retrospective Cohort Study**  
A. Tank, R. Hughey, R. P. Ward, P. Nagele, D. S. Rubin .....854

Among 230,535 patients in a national claims database between 2005 and 2017, 13,936 (6.0%) underwent resting echocardiography within 60 days before surgery, and 12,638 could be classified using the Appropriate Use Criteria for Echocardiography. More than a quarter of all resting echocardiograms (3,679 of 12,638; 29%) were deemed "rarely appropriate," while 71% (8,959 of 12,638) were deemed "appropriate." Surveillance of chronic ischemic heart disease and a diagnosis of uncomplicated hypertension accounted for 43% (1,588 of 3,679) of the "rarely appropriate" preoperative resting echocardiograms. *SUPPLEMENTAL DIGITAL CONTENT IS AVAILABLE IN THE TEXT*

## Pain Medicine

### CLINICAL SCIENCE

-  **Intrathecal Morphine for Analgesia in Minimally Invasive Cardiac Surgery: A Randomized, Placebo-controlled, Double-blinded Clinical Trial**  
R. Dhawan, D. Daubenspeck, K. E. Wroblewski, J.-H. Harrison, M. McCrorey, H. H. Balkhy, M. A. Chaney .....864

Used at a dose of 5 mcg/kg, intrathecal morphine reduced opioid consumption approximately 50% during the first 24 postoperative hours. Additionally, intrathecal morphine reduced pain at rest and with cough for 48 h, although mild nausea was more common among those receiving morphine than those receiving sham saline injections.

-  **Rhythmic Change of Cortical Hemodynamic Signals Associated with Ongoing Nociception in Awake and Anesthetized Individuals: An Exploratory Functional Near Infrared Spectroscopy Study**  
K. Peng, K. Deepti Karunakaran, A. Lee, A. Gomez-Morad, R. Labadie, A. Mizrahi-Arnaud, D. Berry, B. Kussman, D. Zurakowski, L. Micheli, L. Becerra, D. Borsook .....877

Comparable responses to noxious stimuli are seen using functional near infrared imaging methods. This technology could be refined to detect nociception in the clinical environment. *SUPPLEMENTAL DIGITAL CONTENT IS AVAILABLE IN THE TEXT*

## Education

### IMAGES IN ANESTHESIOLOGY

- Intracardial Cement in Postanesthesia Care Unit**  
C. Qiao, M. Lv, Y. Wang .....893

-  **Tracheocele Showing a Distinctive Bullfrog-breathing Pattern**  
R. Kapoor, A. Truong, D.-T. Truong .....894

*SUPPLEMENTAL DIGITAL CONTENT IS AVAILABLE IN THE TEXT*

### CLINICAL FOCUS REVIEW

-  **Benefits and Risks of Dexamethasone in Noncardiac Surgery**  
P. S. Myles, T. Corcoran .....895

Dexamethasone is an effective antiemetic and improves patient quality of recovery. Meta-analyses and a recent large trial found no increase in risk of surgical site infection. Dexamethasone should be more widely used in perioperative practice.

### REVIEW ARTICLE

-  **The Evolution, Current Value, and Future of the American Society of Anesthesiologists Physical Status Classification System**  
B. Horvath, B. Kloesel, M. M. Todd, D. J. Cole, R. C. Prielipp .....904

A comprehensive review and evaluation of the history, current format, strengths, and limitations of the American Society of Anesthesiologists Physical Status classification system.

### MIND TO MIND

- The Curtain Draws Back**  
D. A. Gutman .....920

- A Letter to Medical Students from an Anesthesiologist**  
M. Sung-jin Ok .....922

## CORRESPONDENCE

- Anesthesiologists and Value-based Care: Comment**  
R. E. Carlson, J. A. Martin .....925

- Anesthesiologists and Value-based Care: Reply**  
A. Mahajan, S. A. Esper, D. J. Cole .....926

- Quadratus Lumborum Block in Total Hip Replacement: Comment**  
J. Hu, M. Xu, Q. Wang, J. Yang .....927

|                                                                                                                                                                              |     |
|------------------------------------------------------------------------------------------------------------------------------------------------------------------------------|-----|
| <b>Quadratus Lumborum Block in Total Hip Replacement: Reply</b><br><i>P. Biboulet, O. Choquet, H. Nguyen, S. M. Brixel, F. Swisser,<br/>S. Bringuier, X. Capdevila</i> ..... | 927 |
| <b>Risk of Postoperative Pulmonary Complications: Comment</b><br><i>K. Leslie, P. J. Peyton, D. A. Story</i> .....                                                           | 928 |
| <b>Risk of Postoperative Pulmonary Complications: Reply</b><br><i>J. P. Wanderer, G. Li, R. E. Freundlich</i> .....                                                          | 930 |
| <b>One-lung Ventilation and Complications: Comment</b><br><i>P. Schober, S. A. Loer, L. A. Schwarte</i> .....                                                                | 931 |
| <b>One-lung Ventilation and Complications: Comment</b><br><i>Y. Zhu, F. Wang, T. Zhu</i> .....                                                                               | 932 |
| <b>One-lung Ventilation and Complications: Comment</b><br><i>J. V. Roth</i> .....                                                                                            | 933 |
| <b>An Updated Minimal Clinically Important Difference for the QoR-15 Scale</b><br><i>P. S. Myles, D. B. Myles</i> .....                                                      | 934 |

|                      |     |
|----------------------|-----|
| <b>Erratum</b> ..... | 936 |
|----------------------|-----|

## Anesthesiology Reflections from the Wood Library-Museum

|                                                                                                                                                                |     |
|----------------------------------------------------------------------------------------------------------------------------------------------------------------|-----|
| <b>Shipway Apparatus: Warming up to Ether Administration</b><br><i>Melissa L. Coleman and Jane S. Moon</i> .....                                               | 787 |
| <b>After the Ether Dome, Bulfinch Drafted His Way to the U.S. Capitol</b><br><i>Melissa L. Coleman and Jane S. Moon</i> .....                                  | 828 |
| <b>Skirting Male Chauvinism in Physician Training: Dr. Emily Blackwell and the Woman's Medical College</b><br><i>Jane S. Moon and Melissa L. Coleman</i> ..... | 841 |
| <b>The National Halothane Study: Did "Fluothane" Deliver or De-liver?</b><br><i>Jane S. Moon and Melissa L. Coleman</i> .....                                  | 853 |

|                                   |     |
|-----------------------------------|-----|
| <b>Careers &amp; Events</b> ..... | A19 |
|-----------------------------------|-----|

## INSTRUCTIONS FOR AUTHORS

The most recently updated version of the Instructions for Authors is available at [www.anesthesiology.org](http://www.anesthesiology.org). Please refer to the Instructions for the preparation of any material for submission to ANESTHESIOLOGY.

Manuscripts submitted for consideration for publication must be submitted in electronic format via Editorial Manager (<https://www.editorialmanager.com/aln>). Detailed directions for submission and the most recent version of the Instructions for Authors can be found on the Journal's Web site (<http://www.anesthesiology.org>). Books and educational materials for review should be sent to Alan Jay Schwartz, M.D., M.S.Ed., Director of Education, Department of Anesthesiology and Critical Care Medicine, The Children's Hospital of Philadelphia,

34th Street and Civic Center Blvd., Room 9327, Philadelphia, Pennsylvania 19104-4399. Article-specific permission requests are managed with Copyright Clearance Center's Rightslink service. Information can be accessed directly from articles on the journal Web site. More information is available at <http://anesthesiology.pubs.asahq.org/public/rightsandpermissions.aspx>. For questions about the Rightslink service, e-mail [customer-care@copyright.com](mailto:customer-care@copyright.com) or call 877-622-5543 (U.S. only) or 978-777-9929. Advertising and related correspondence should be addressed to Advertising Manager, ANESTHESIOLOGY, Wolters Kluwer Health, Inc., Two Commerce Square, 2001 Market Street, Philadelphia, Pennsylvania 19103 (Web site: <http://www.wkccenter.com/>). Publication of an advertisement in ANESTHESIOLOGY does not constitute endorsement by the Society or Wolters Kluwer Health, Inc. of the product or service described therein or of any representations made by the advertiser with respect to the product or service.

**ANESTHESIOLOGY** (ISSN 0003-3022) is published monthly by Wolters Kluwer Health, Inc., 1800 Dual Highway, Suite 201, Hagerstown, MD 21740-6636. Business office: Two Commerce Square, 2001 Market Street, Philadelphia, PA 19103. Periodicals postage paid at Hagerstown, MD, and at additional mailing offices. Copyright © 2021, the American Society of Anesthesiologists. All Rights Reserved.

**Annual Subscription Rates:** *United States*—\$1077 Individual, \$2671 Institution, \$434 In-training. *Rest of World*—\$1136 Individual, \$2965 Institution, \$434 In-training. Single copy rate \$266. Subscriptions outside of North America must add \$58 for airfreight delivery. Add state sales tax, where applicable. The GST tax of 7% must be added to all orders shipped to Canada (Wolters Kluwer Health, Inc.'s GST Identification #895524239, Publications Mail Agreement #1119672). Indicate in-training status and name of institution. Institution rates apply to libraries, hospitals, corporations, and partnerships of three or more individuals. Subscription prices outside the United States must be prepaid. Prices subject to change without notice. Subscriptions will begin with currently available issue unless otherwise requested. Visit us online at [www.lww.com](http://www.lww.com).

Individual and in-training subscription rates include print and access to the online version. Online-only subscriptions for individuals (\$356) and persons in training (\$356) are available to nonmembers and may be ordered by downloading a copy of the Online Subscription FAXback Form from the Web site, completing the information requested, and faxing the completed form to 301-223-2400. Institutional rates are for print only; online subscriptions are available via Ovid. Institutions can choose to purchase a print and online subscription together for a discounted rate. Institutions that wish to purchase a print subscription, please contact Wolters Kluwer Health,

Inc., 1800 Dual Highway, Suite 201, Hagerstown, MD 21740-6636; phone: 800-638-3030; fax: 301-223-2400. Institutions that wish to purchase an online subscription or online with print, please contact the Ovid Regional Sales Office near you or visit [www.ovid.com/site/index.jsp](http://www.ovid.com/site/index.jsp) and select Contact and Locations.

**Address for non-member subscription information, orders, or change of address:** Wolters Kluwer Health, Inc., 1800 Dual Highway, Suite 201, Hagerstown, MD 21740-6636; phone: 800-638-3030; fax: 301-223-2400.

**Address for member subscription information, orders, or change of address:** Members of the American Society of Anesthesiologists receive the print and online journal with their membership. To become a member or provide a change of address, please contact the American Society of Anesthesiologists, 1061 American Lane, Schaumburg, Illinois 60173-4973; phone: 847-825-5586; fax: 847-825-1692; e-mail: [membership@ASAhq.org](mailto:membership@ASAhq.org). For all other membership inquiries, contact Wolters Kluwer Health, Inc., Customer Service Department, P.O. Box 1610, Hagerstown, MD 21740; phone: 800-638-3030; fax: 301-223-2400.

**Postmaster:** Send address changes to ANESTHESIOLOGY, P.O. BOX 1610, Hagerstown, MD 21740.

**Advertising:** Please contact Hilary Druker, National Account Manager, Health Learning, Research & Practice, Medical Journals, Wolters Kluwer Health, Inc.; phone: 609-304-9187; e-mail: [Hilary.Druker@wolterskluwer.com](mailto:Hilary.Druker@wolterskluwer.com). For classified advertising: Dave Wiegand, Recruitment Advertising Representative, Wolters Kluwer Health, Inc.; phone: 847-361-6128; e-mail: [Dave.Wiegand@wolterskluwer.com](mailto:Dave.Wiegand@wolterskluwer.com).
